# Supplementary material for: Enhanced electron injection and efficiency in blended-layer organic light emitting diodes with aluminium cathodes: new 2,5-diaryl-1,3,4-oxadiazole–fluorene hybrids incorporating pyridine units
Source: Royal Society of Chemistry journal article supplement (doi:10.1039/b510003h), 2005-01-01
Supplement: b510003h.pdf [file b510003h.pdf]

**Enhanced electron injection and efficiency in blended-layer organic light emitting diodes with aluminium cathodes: new 2,5-diaryl-1,3,4-oxadiazole–fluorene hybrids incorporating pyridine units**Stephen Oyston,<sup>a</sup> Changsheng Wang,<sup>a</sup> Igor F. Perepichka,<sup>a</sup> Andrei S. Batsanov,<sup>a</sup> Martin R. Bryce,<sup>\*a</sup> Jin H. Ahn,<sup>b</sup> and Michael C. Petty<sup>\*b</sup><sup>a</sup> Department of Chemistry and Centre for Molecular and Nanoscale Electronics, University of Durham, Durham, UK, DH1 3LE. E-mail: [m.r.bryce@durham.ac.uk](mailto:m.r.bryce@durham.ac.uk)<sup>b</sup> School of Engineering and Centre for Molecular and Nanoscale Electronics, University of Durham, Durham, UK, DH1 3LE. E-mail: [m.c.petty@durham.ac.uk](mailto:m.c.petty@durham.ac.uk)**X-Ray Molecular Structure of 11.**

The asymmetric unit comprises two molecules, A and B, each having one *t*-Bu and one *n*-hexyl group conformationally disordered (Figure S1). The conformations of the molecular ‘rod’ are somewhat different. In molecule B, as in **8**, the central fluorene moiety is planar with the mean deviation  $\delta=0.013$  Å (max.  $\delta=0.025$  Å), whilst in molecule A it is substantially puckered (mean  $\delta=0.08$ , max. 0.16 Å). The interplanar angles between the fluorene moiety (or rather its outer 6-membered rings, **i** and **v**, Figure S1a) and the adjacent thiophene rings **ii** and **vi** varies from 4.6 to 36.4°, but on average are smaller than the corresponding angles in **8**, which has benzene rings instead of thiophene. In both molecules of **11**, the mutual orientation of the two thiophene rings is *transoid*, that of oxadiazole rings also *transoid*, and each adjacent pair of thiophene and oxadiazole rings has the S and O atoms in *trans*-positions relative to the connecting C–C bond. The dihedral angles between these and other rings along the chain are also mostly small. Overall, the ‘rod’ acquires some out-of-plane bending. Thus, the two outlying C(benzene)–C(*t*-Bu) bonds deviate from the fluorene mean plane by ca. 1° and 22° in molecule A, 17° and 25° in B.

The single-crystal X-ray diffraction experiment was carried out on a Bruker SMART 3-circle diffractometer with an APEX CCD area detector, using graphite monochromated Mo- $K_{\alpha}$  radiation ( $\lambda=0.71073$  Å) from 60W Mo-target microfocus Bede Microsource® X-ray generator with glass polycapillary X-ray optics and a Cryostream-Plus open-flow N<sub>2</sub> cryostat. The structure was solved by direct methods and refined by full-matrix least squares against  $F^2$  of all reflections, using SHELXTL 6.14 software (Bruker-Nonius AXS, Madison, WI, USA, 2003). *Crystal data*: C<sub>57</sub>H<sub>62</sub>N<sub>4</sub>O<sub>2</sub>S<sub>2</sub>,  $M=899.23$ ,  $T=120$  K, triclinic, space group  $P\bar{1}$  (No. 2),  $a=16.095(2)$ ,  $b=16.647(2)$ ,  $c=19.390(2)$  Å,  $\alpha=82.61(1)$ ,  $\beta=87.70(1)$ ,  $\gamma=72.94(1)^\circ$ ,  $U=4925(1)$  Å<sup>3</sup>,  $Z=4$ ,  $D_c=1.213$  g cm<sup>-3</sup>,  $\mu=0.15$  mm<sup>-1</sup>, 47733 reflections ( $2\theta\leq 50^\circ$ ), 17322 unique,  $R_{int}=0.093$ ,  $R=0.048$  [6940 data with  $F^2\geq 2\sigma(F^2)$ ],  $wR(F^2)=0.147$  (all data).

**Table S1.** Angles (°) between ring planes in **11** (molecules A and B) and corresponding angles in **8**

|        | A    | B    | <b>8</b> |          | A    | B    | <b>8</b> |
|--------|------|------|----------|----------|------|------|----------|
| i/v    | 9.7  | 1.0  | 0        |          |      |      |          |
| i/ii   | 8.2  | 12.9 | 21.9     | v/vi     | 36.4 | 4.6  | 30.3     |
| ii/iii | 11.3 | 5.8  | 5.0      | vi/vii   | 7.4  | 7.5  | 11.4     |
| iii/iv | 23.6 | 12.4 | 6.7      | vii/viii | 11.5 | 31.4 | 9.5      |

Ring notation for **11** see in Fig. S1a. In **8**, rings ii and vi are benzene instead of thiophene

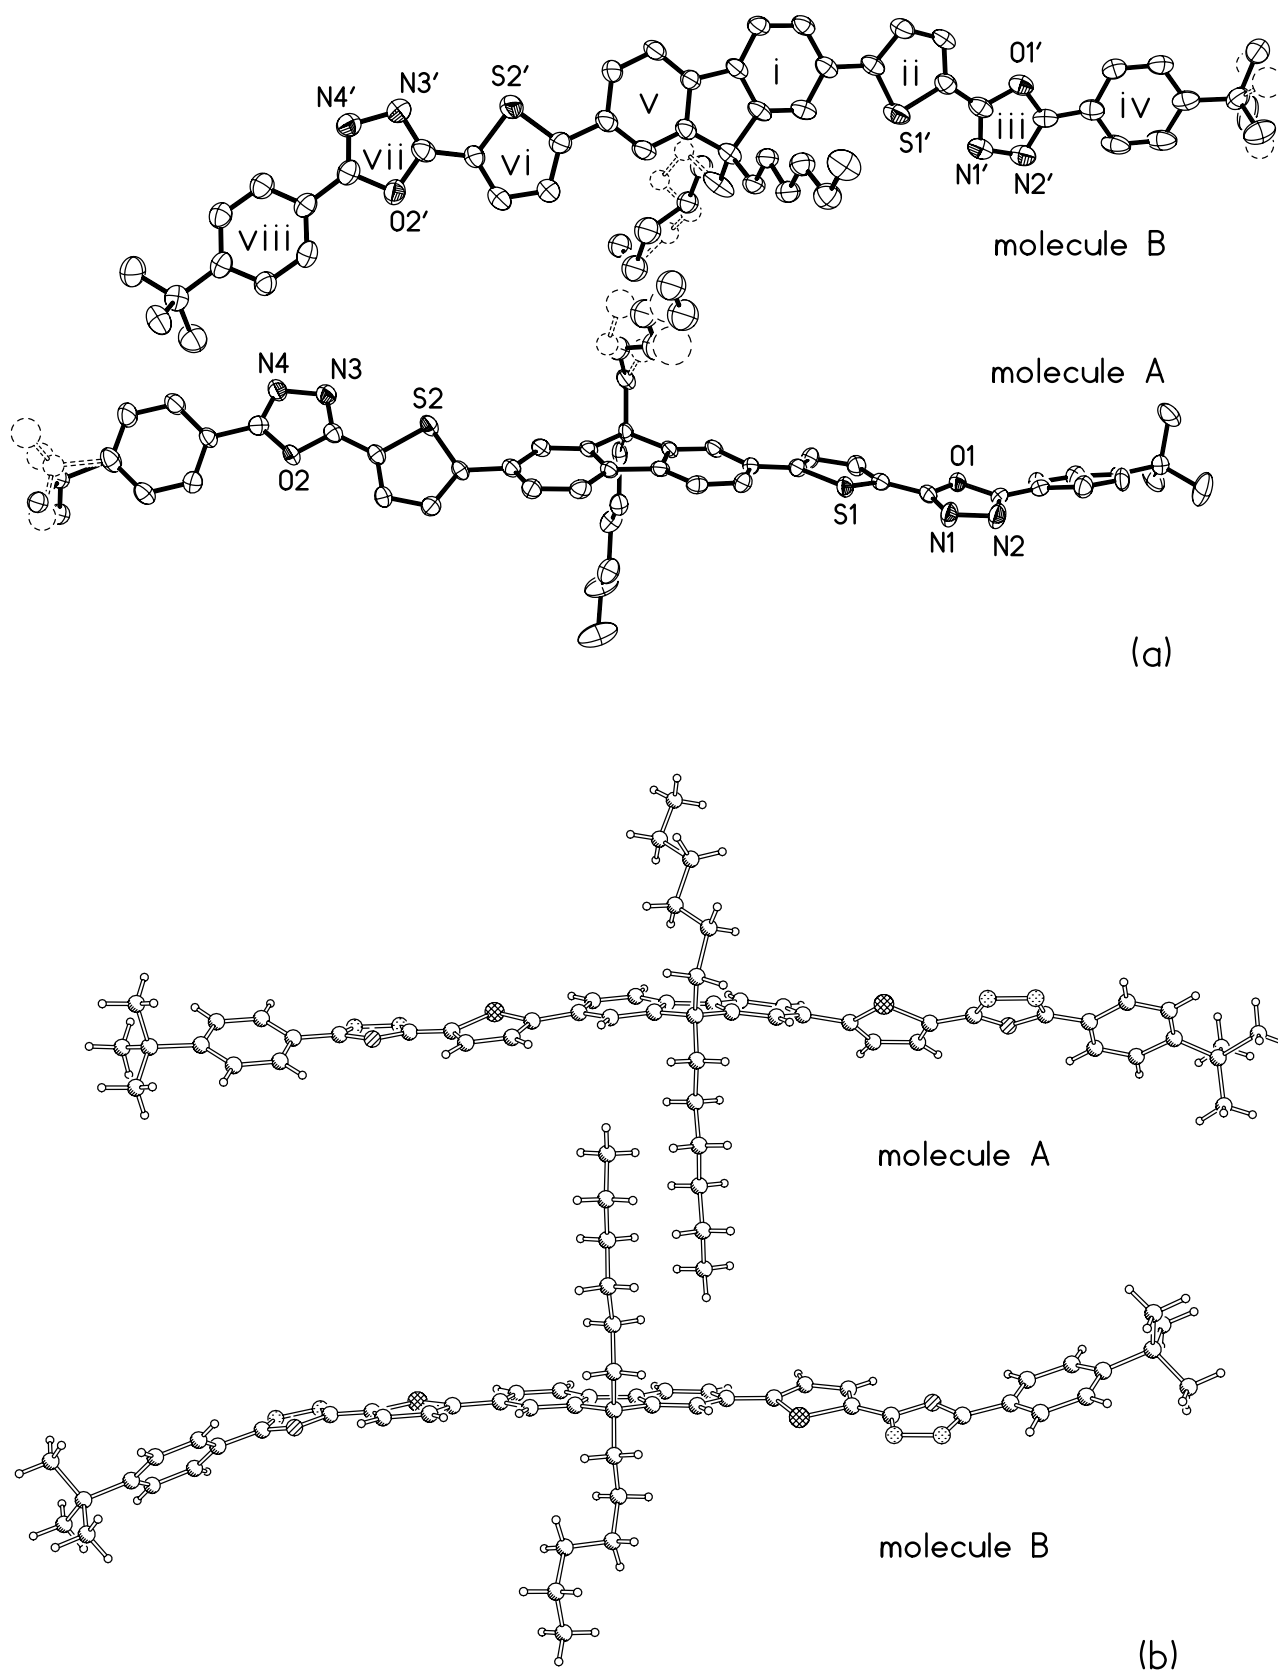

**Figure S1.** X-Ray molecular structure of compound **11**: (a) the asymmetric unit, showing thermal ellipsoids at the 50% probability level and the disorder; H atoms are omitted for clarity; (b) two independent molecules shown in the same orientation; minor positions of the disordered atoms are omitted.

**Theoretical Calculations**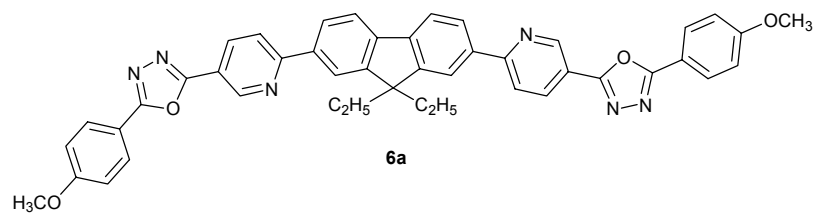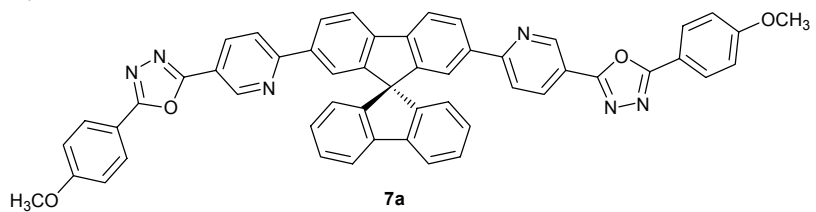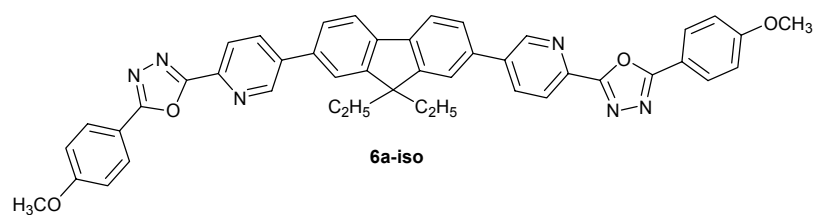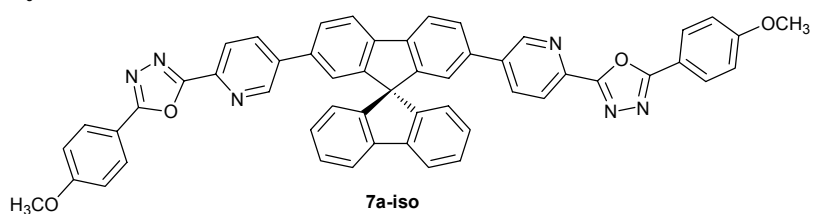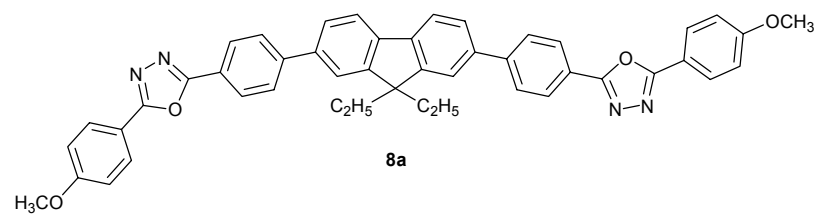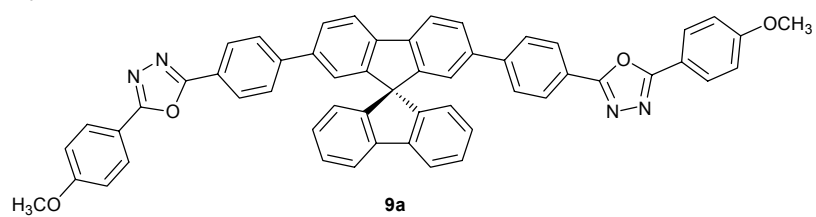

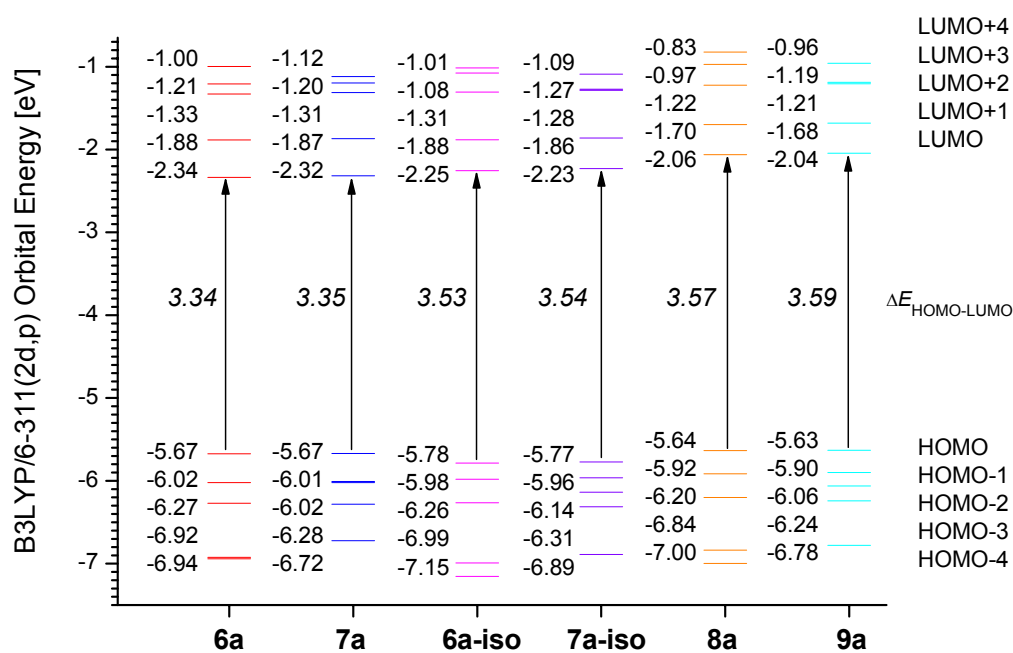

**Figure S2.** B3LYP/6-311G(2d,p)//B3LYP/6-31G(d) orbital energy level diagram for compounds **6a**, **7a** and a comparison with isomers **6a-iso** and **7a-iso**, and with phenylene analogues **8a** and **9a**.

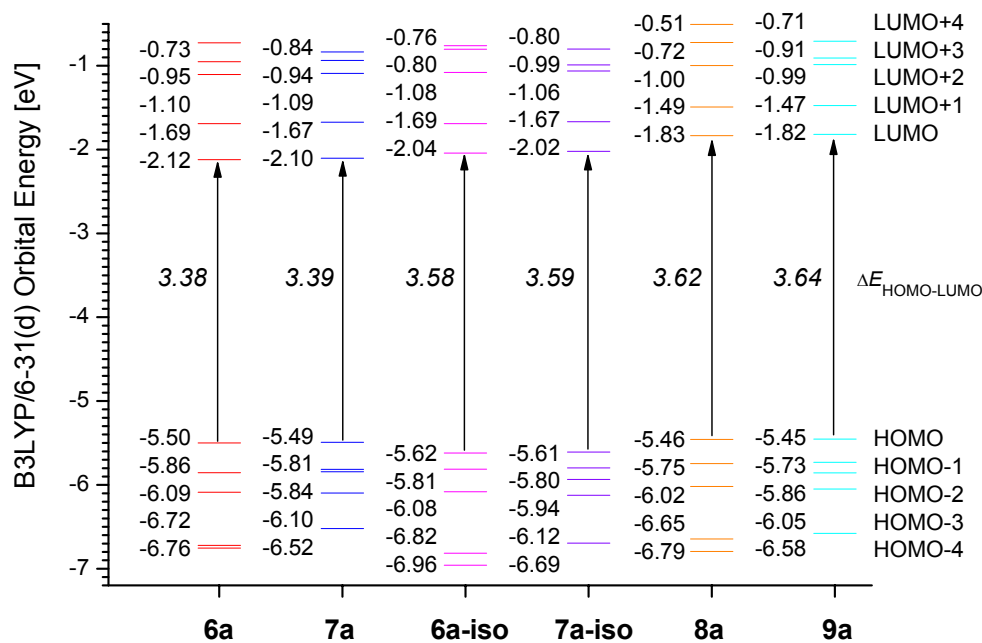

**Figure S3.** B3LYP/6-31G(d) orbital energy level diagram for compounds **6a**, **7a** and a comparison with isomers **6a-iso** and **7a-iso**, and with phenylene analogues **8a** and **9a**.

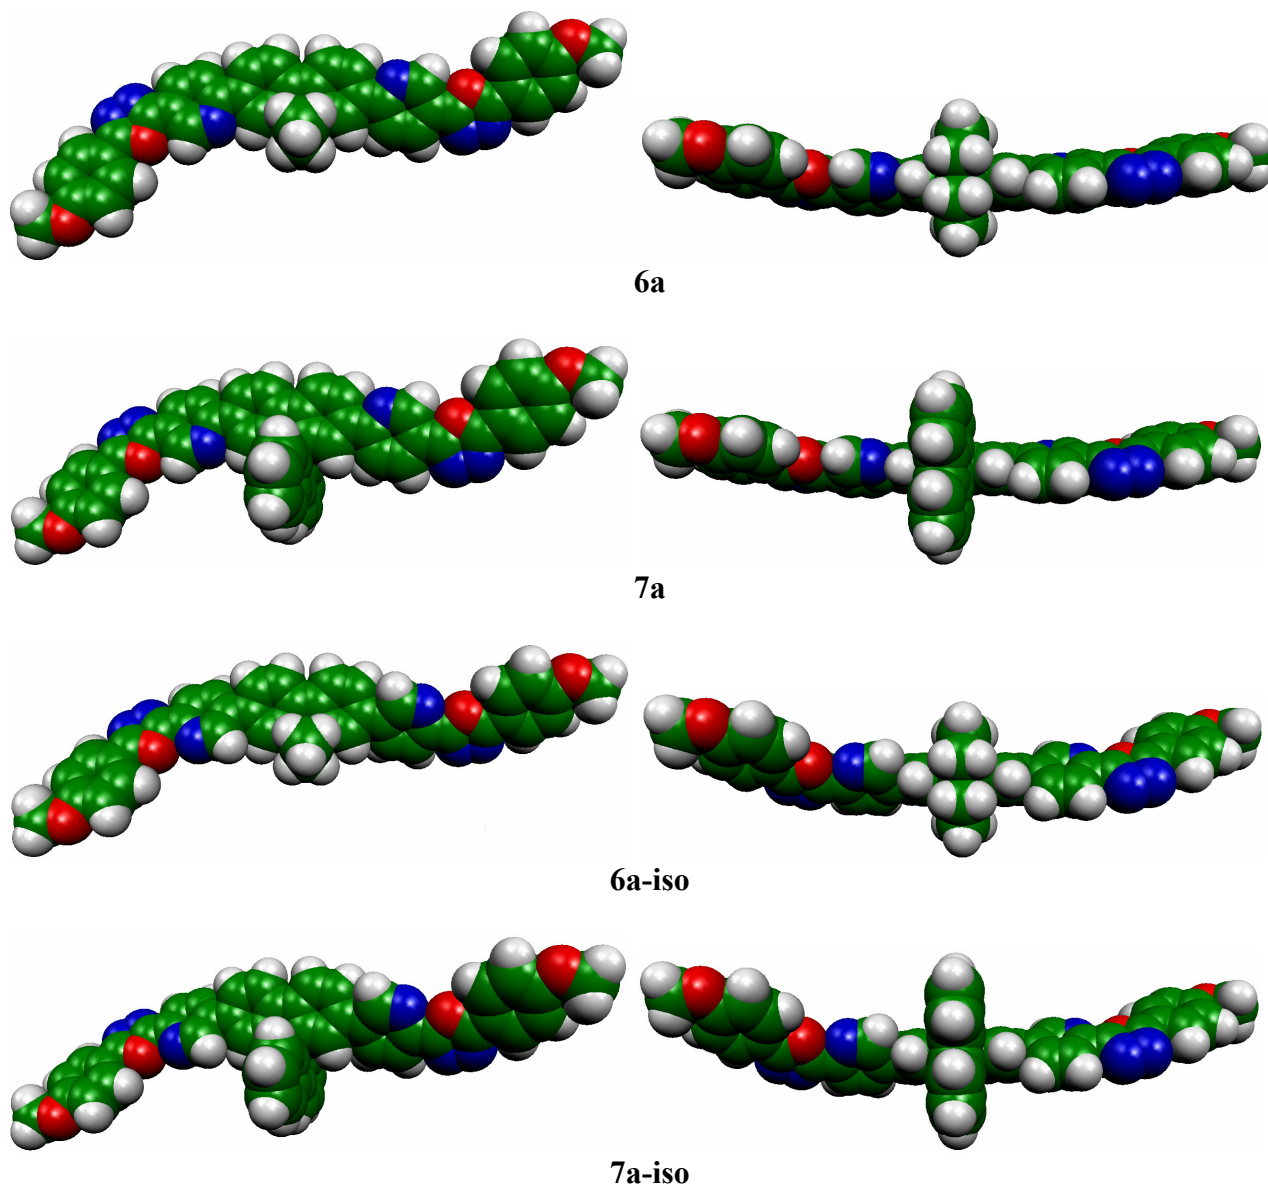

**Figure S4.** B3LYP/6-31G(d) optimised geometries of compound **6a**, **7a**, **6a-iso** and **7a-iso**.

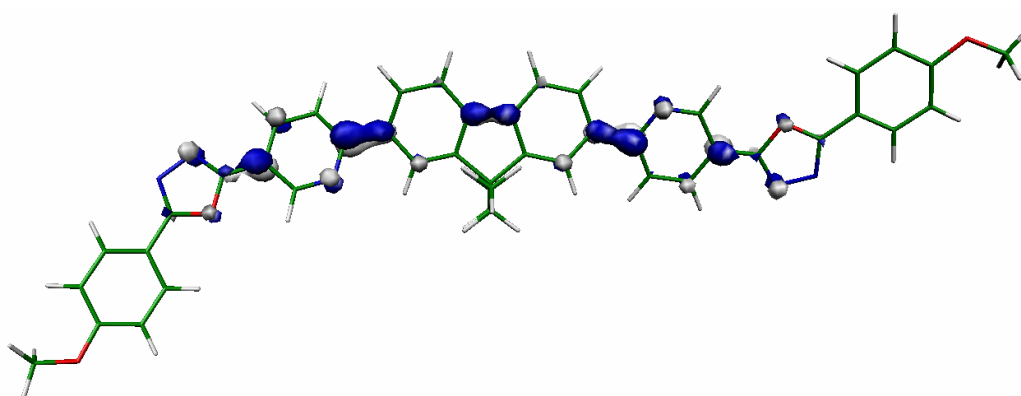

**6a**, LUMO = -2.34 eV

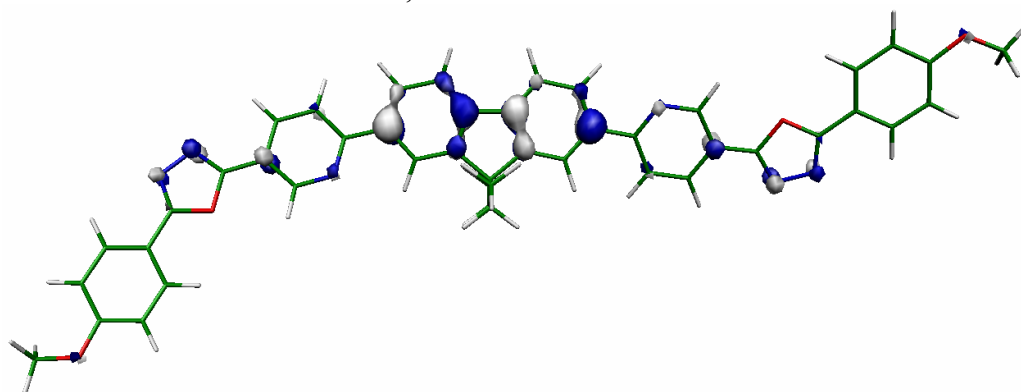

**6a**, HOMO = -5.67 eV

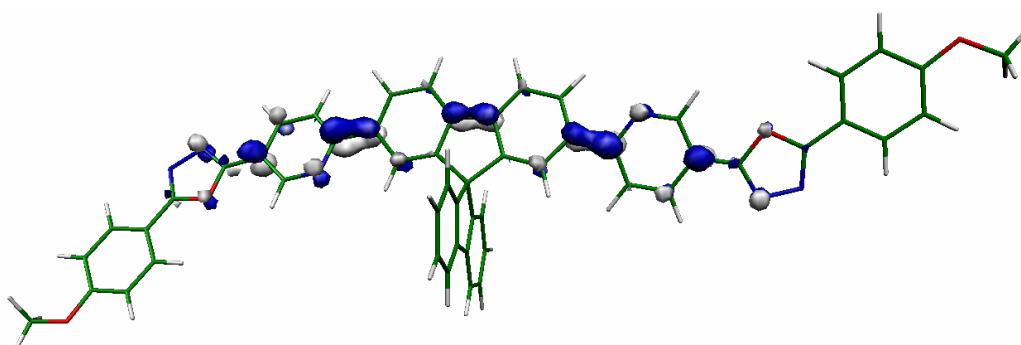

**7a**, LUMO = -2.32 eV

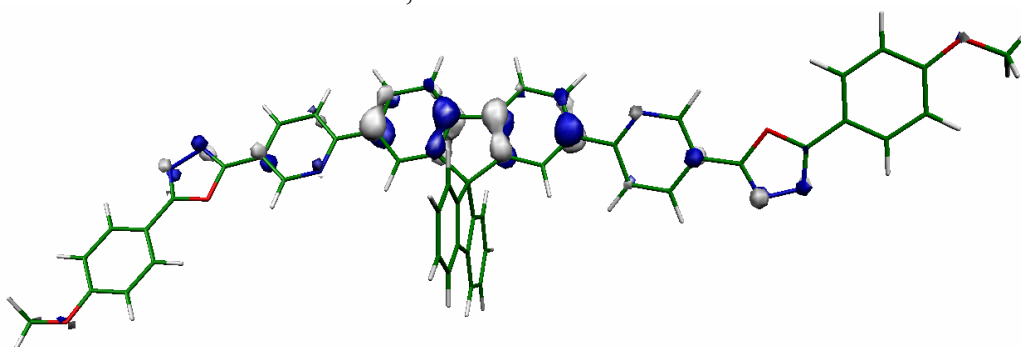

**7a**, HOMO = -5.67 eV

**Figure S5.** Frontier orbitals of compounds **6a** ( $E_{\text{total}} = -2366.5004319$  Hartree) and **7a** ( $E_{\text{total}} = -2670.2215067$  Hartree) calculated by DFT method at B3LYP/6-311G(2d,p)/B3LYP6031G(d) level.

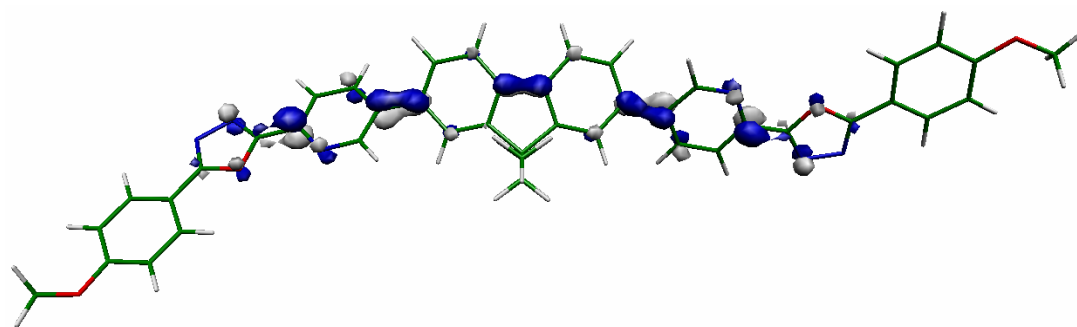

**6a-iso**, LUMO = -2.25 eV

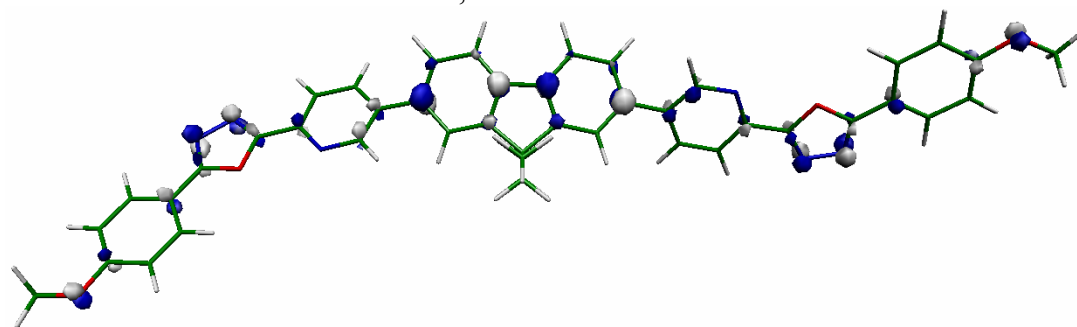

**6a-iso**, HOMO = -5.78 eV

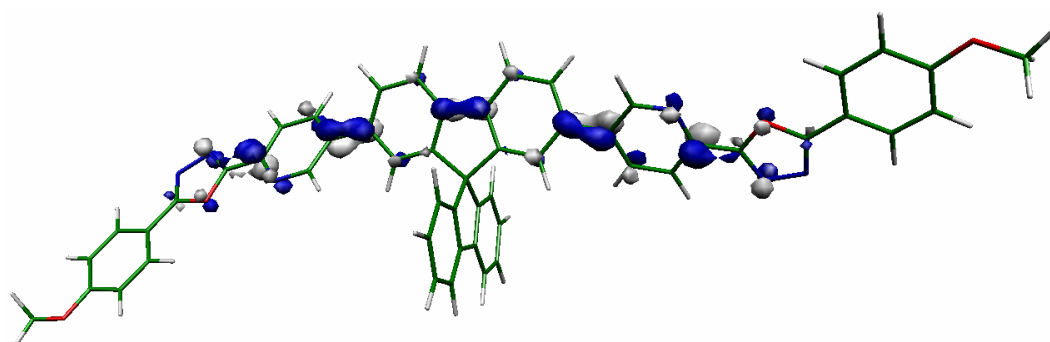

**7a-iso**, LUMO = -2.23 eV

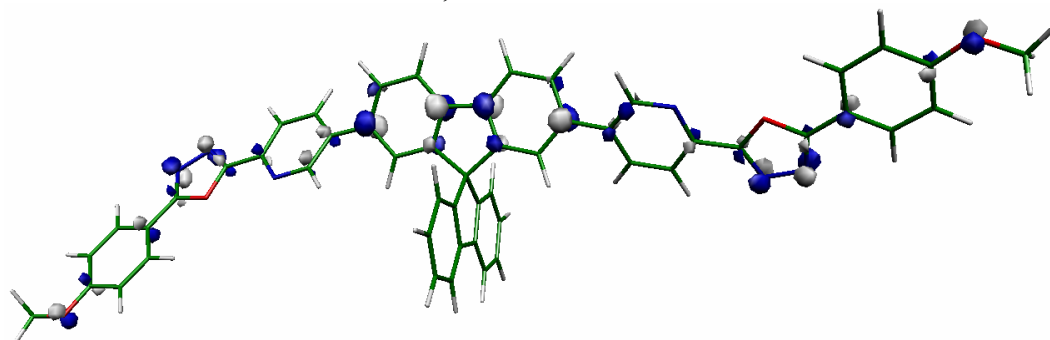

**7a-iso**, HOMO = -5.77 eV

**Figure S6.** Frontier orbitals of compounds **6a-iso** ( $E_{\text{total}} = -2366.4931201$  Hartree), **7a-iso** ( $E_{\text{total}} = -2670.2148323$  Hartree) calculated by DFT method at B3LYP/6-311G(2d,p)//B3LYP6031G(d) DFT level.

**Table S1.** B3LYP/6-31G(d) optimised geometry of compound **6a**. $E_{\text{total}} = -2365.8768971$  Hartree

Dipole moment (Debye): X = 0.3933 Y = 1.1267 Z = -0.8190 Tot = 1.4474

| Center<br>Number | Atomic<br>Number | Atomic<br>Type | Coordinates (Angstroms) |           |           |
|------------------|------------------|----------------|-------------------------|-----------|-----------|
|                  |                  |                | X                       | Y         | Z         |
| 1                | 6                | 0              | 3.388573                | -0.523010 | 0.331791  |
| 2                | 6                | 0              | 2.255730                | 0.311373  | 0.427260  |
| 3                | 6                | 0              | 0.982581                | -0.233064 | 0.347139  |
| 4                | 6                | 0              | 0.812677                | -1.621634 | 0.170018  |
| 5                | 6                | 0              | 1.926615                | -2.459409 | 0.065793  |
| 6                | 6                | 0              | 3.200862                | -1.906715 | 0.142855  |
| 7                | 6                | 0              | -0.620940               | -1.910744 | 0.118545  |
| 8                | 6                | 0              | -1.329682               | -0.698931 | 0.258171  |
| 9                | 6                | 0              | -2.714949               | -0.689144 | 0.243888  |
| 10               | 6                | 0              | -3.427800               | -1.897359 | 0.094833  |
| 11               | 6                | 0              | -2.705328               | -3.097827 | -0.051966 |
| 12               | 6                | 0              | -1.312728               | -3.113422 | -0.041020 |
| 13               | 6                | 0              | -0.368310               | 0.479905  | 0.412923  |
| 14               | 6                | 0              | -0.533646               | 1.517570  | -0.736449 |
| 15               | 6                | 0              | -0.376574               | 0.973936  | -2.159763 |
| 16               | 6                | 0              | -0.572997               | 1.219708  | 1.767306  |
| 17               | 6                | 0              | -0.440730               | 0.361244  | 3.028896  |
| 18               | 6                | 0              | 4.766291                | 0.018599  | 0.415843  |
| 19               | 6                | 0              | -4.910670               | -1.869969 | 0.088049  |
| 20               | 7                | 0              | 5.758724                | -0.778164 | -0.032898 |
| 21               | 6                | 0              | 7.012442                | -0.338158 | 0.012712  |
| 22               | 6                | 0              | 7.379894                | 0.924491  | 0.503770  |
| 23               | 6                | 0              | 6.353324                | 1.749986  | 0.987811  |
| 24               | 6                | 0              | 5.046414                | 1.293439  | 0.947954  |
| 25               | 6                | 0              | -5.693088               | -3.032480 | 0.242078  |
| 26               | 6                | 0              | -7.074494               | -2.940646 | 0.214511  |
| 27               | 6                | 0              | -7.672515               | -1.682582 | 0.043091  |
| 28               | 6                | 0              | -6.817772               | -0.576248 | -0.080980 |
| 29               | 7                | 0              | -5.491134               | -0.660731 | -0.061403 |
| 30               | 6                | 0              | 8.760219                | 1.373721  | 0.528095  |
| 31               | 6                | 0              | -9.118006               | -1.553437 | 0.006733  |
| 32               | 7                | 0              | 9.234773                | 2.503362  | 0.969040  |
| 33               | 7                | 0              | 10.607585               | 2.462647  | 0.776155  |
| 34               | 6                | 0              | 10.877132               | 1.309375  | 0.229778  |
| 35               | 8                | 0              | 9.746877                | 0.560619  | 0.041670  |
| 36               | 7                | 0              | -10.014710              | -2.493227 | 0.098566  |
| 37               | 7                | 0              | -11.252592              | -1.874522 | 0.010560  |
| 38               | 6                | 0              | -11.026472              | -0.597655 | -0.129738 |
| 39               | 8                | 0              | -9.686467               | -0.317886 | -0.140848 |
| 40               | 6                | 0              | 12.166330               | 0.774276  | -0.174044 |
| 41               | 6                | 0              | -11.986406              | 0.484676  | -0.265582 |
| 42               | 6                | 0              | 12.283935               | -0.496678 | -0.766080 |
| 43               | 6                | 0              | 13.524631               | -0.983814 | -1.143811 |
| 44               | 6                | 0              | 14.680555               | -0.212608 | -0.939065 |
| 45               | 6                | 0              | 14.573709               | 1.056065  | -0.349684 |
| 46               | 6                | 0              | 13.324218               | 1.539088  | 0.027013  |
| 47               | 6                | 0              | -11.574972              | 1.824021  | -0.393530 |
| 48               | 6                | 0              | -12.511050              | 2.837504  | -0.520099 |
| 49               | 6                | 0              | -13.883304              | 2.537821  | -0.522456 |
| 50               | 6                | 0              | -14.303613              | 1.205297  | -0.395787 |
| 51               | 6                | 0              | -13.357853              | 0.192565  | -0.268772 |
| 52               | 8                | 0              | 15.847061               | -0.781687 | -1.343478 |
| 53               | 8                | 0              | -14.718246              | 3.602793  | -0.652088 |
| 54               | 6                | 0              | -16.120236              | 3.369224  | -0.660834 |
| 55               | 6                | 0              | 17.055403               | -0.055590 | -1.162668 |
| 56               | 1                | 0              | 2.375856                | 1.385514  | 0.537279  |
| 57               | 1                | 0              | 1.807645                | -3.530831 | -0.074148 |
| 58               | 1                | 0              | 4.080042                | -2.534917 | 0.057860  |
| 59               | 1                | 0              | -3.280288               | 0.231390  | 0.344336  |
| 60               | 1                | 0              | -3.231820               | -4.034968 | -0.200987 |
| 61               | 1                | 0              | -0.780127               | -4.052918 | -0.163063 |
| 62               | 1                | 0              | -1.523801               | 1.980677  | -0.630469 |



|    |   |   |            |           |           |
|----|---|---|------------|-----------|-----------|
| 63 | 1 | 0 | 0.196760   | 2.321569  | -0.571024 |
| 64 | 1 | 0 | -0.504316  | 1.781367  | -2.889456 |
| 65 | 1 | 0 | 0.614895   | 0.536077  | -2.315921 |
| 66 | 1 | 0 | -1.123739  | 0.204406  | -2.379567 |
| 67 | 1 | 0 | 0.148782   | 2.046987  | 1.812095  |
| 68 | 1 | 0 | -1.567081  | 1.686093  | 1.746852  |
| 69 | 1 | 0 | -0.600074  | 0.974527  | 3.922956  |
| 70 | 1 | 0 | -1.179077  | -0.447216 | 3.043402  |
| 71 | 1 | 0 | 0.554057   | -0.090045 | 3.106208  |
| 72 | 1 | 0 | 7.773812   | -1.019059 | -0.361889 |
| 73 | 1 | 0 | 6.597506   | 2.727131  | 1.392225  |
| 74 | 1 | 0 | 4.251319   | 1.914113  | 1.345158  |
| 75 | 1 | 0 | -5.227087  | -3.998242 | 0.400164  |
| 76 | 1 | 0 | -7.700385  | -3.819678 | 0.330579  |
| 77 | 1 | 0 | -7.233509  | 0.421569  | -0.204283 |
| 78 | 1 | 0 | 11.396740  | -1.099925 | -0.928745 |
| 79 | 1 | 0 | 13.629147  | -1.962244 | -1.601362 |
| 80 | 1 | 0 | 15.451084  | 1.669594  | -0.181693 |
| 81 | 1 | 0 | 13.234646  | 2.519697  | 0.483014  |
| 82 | 1 | 0 | -10.517024 | 2.065327  | -0.392703 |
| 83 | 1 | 0 | -12.207196 | 3.874550  | -0.619122 |
| 84 | 1 | 0 | -15.356698 | 0.949781  | -0.395201 |
| 85 | 1 | 0 | -13.676091 | -0.840185 | -0.170482 |
| 86 | 1 | 0 | -16.584173 | 4.350542  | -0.771905 |
| 87 | 1 | 0 | -16.415593 | 2.729872  | -1.502533 |
| 88 | 1 | 0 | -16.456973 | 2.911847  | 0.278229  |
| 89 | 1 | 0 | 17.847951  | -0.695929 | -1.553074 |
| 90 | 1 | 0 | 17.043538  | 0.889442  | -1.720510 |
| 91 | 1 | 0 | 17.244532  | 0.151273  | -0.101592 |

**Table S2.** B3LYP/6-31G(d) optimised geometry of compound **7a**. $E_{\text{total}} = -2669.5300258$  Hartree

Dipole moment (Debye): X= -0.4242 Y= -0.9557 Z= -0.9529 Tot= 1.4147

| Center Number | Atomic Number | Atomic Type | Coordinates (Angstroms) |           |           |
|---------------|---------------|-------------|-------------------------|-----------|-----------|
|               |               |             | X                       | Y         | Z         |
| 1             | 6             | 0           | 3.316780                | 2.282052  | 0.133007  |
| 2             | 6             | 0           | 2.592525                | 3.487261  | 0.040944  |
| 3             | 6             | 0           | 1.200006                | 3.501035  | 0.041735  |
| 4             | 6             | 0           | 0.509276                | 2.290807  | 0.137091  |
| 5             | 6             | 0           | 1.224180                | 1.079010  | 0.221611  |
| 6             | 6             | 0           | 2.608529                | 1.066182  | 0.215167  |
| 7             | 6             | 0           | -0.924383               | 1.995758  | 0.165865  |
| 8             | 6             | 0           | -2.043054               | 2.831551  | 0.098325  |
| 9             | 6             | 0           | -3.313985               | 2.268235  | 0.145804  |
| 10            | 6             | 0           | -3.496242               | 0.875600  | 0.268623  |
| 11            | 6             | 0           | -2.361775               | 0.042662  | 0.326422  |
| 12            | 6             | 0           | -1.095147               | 0.602412  | 0.275246  |
| 13            | 6             | 0           | 0.631821                | -1.560162 | 3.886728  |
| 14            | 6             | 0           | 0.888710                | -2.889996 | 3.535182  |
| 15            | 6             | 0           | 0.935846                | -3.275426 | 2.193634  |
| 16            | 6             | 0           | 0.722479                | -2.310878 | 1.206651  |
| 17            | 6             | 0           | 0.463935                | -0.974019 | 1.564268  |
| 18            | 6             | 0           | 0.417161                | -0.592126 | 2.899530  |
| 19            | 6             | 0           | 0.710555                | -2.416475 | -0.259065 |
| 20            | 6             | 0           | 0.909882                | -3.513079 | -1.100259 |
| 21            | 6             | 0           | 0.839801                | -3.324560 | -2.482197 |
| 22            | 6             | 0           | 0.574534                | -2.058899 | -3.016684 |
| 23            | 6             | 0           | 0.374545                | -0.958741 | -2.175755 |
| 24            | 6             | 0           | 0.444142                | -1.144580 | -0.800472 |
| 25            | 6             | 0           | 0.261086                | -0.109788 | 0.315036  |
| 26            | 6             | 0           | 4.799906                | 2.260650  | 0.138017  |
| 27            | 6             | 0           | -4.871830               | 0.324475  | 0.327728  |
| 28            | 6             | 0           | -5.143722               | -0.976950 | 0.795242  |
| 29            | 6             | 0           | -6.448994               | -1.439410 | 0.818781  |
| 30            | 6             | 0           | -7.480808               | -0.594094 | 0.382306  |

|    |   |   |            |           |           |
|----|---|---|------------|-----------|-----------|
| 31 | 6 | 0 | -7.120443  | 0.692593  | -0.047544 |
| 32 | 7 | 0 | -5.868459  | 1.139266  | -0.076451 |
| 33 | 7 | 0 | 5.385978   | 1.070848  | -0.108223 |
| 34 | 6 | 0 | 6.713013   | 0.992908  | -0.120560 |
| 35 | 6 | 0 | 7.561314   | 2.087760  | 0.107812  |
| 36 | 6 | 0 | 6.956478   | 3.324433  | 0.380367  |
| 37 | 6 | 0 | 5.574206   | 3.408809  | 0.400193  |
| 38 | 6 | 0 | -8.859787  | -1.048244 | 0.393275  |
| 39 | 7 | 0 | -9.328993  | -2.197385 | 0.786978  |
| 40 | 7 | 0 | -10.702913 | -2.152195 | 0.603463  |
| 41 | 6 | 0 | -10.978506 | -0.976896 | 0.109650  |
| 42 | 8 | 0 | -9.851342  | -0.217371 | -0.051709 |
| 43 | 6 | 0 | 9.007716   | 1.965962  | 0.078291  |
| 44 | 7 | 0 | 9.900561   | 2.893144  | 0.275487  |
| 45 | 7 | 0 | 11.141252  | 2.287739  | 0.143648  |
| 46 | 6 | 0 | 10.920298  | 1.030776  | -0.125597 |
| 47 | 8 | 0 | 9.581471   | 0.752034  | -0.183210 |
| 48 | 6 | 0 | -12.271555 | -0.428742 | -0.263310 |
| 49 | 6 | 0 | 11.884284  | -0.032082 | -0.354828 |
| 50 | 6 | 0 | -12.395839 | 0.863833  | -0.804900 |
| 51 | 6 | 0 | -13.640187 | 1.362690  | -1.154418 |
| 52 | 6 | 0 | -14.793202 | 0.581837  | -0.971039 |
| 53 | 6 | 0 | -14.679693 | -0.708408 | -0.431935 |
| 54 | 6 | 0 | -13.426590 | -1.203097 | -0.083449 |
| 55 | 6 | 0 | 11.476777  | -1.349115 | -0.635969 |
| 56 | 6 | 0 | 12.416241  | -2.344611 | -0.850071 |
| 57 | 6 | 0 | 14.204265  | -0.738604 | -0.508784 |
| 58 | 6 | 0 | 13.255169  | 0.256269  | -0.294964 |
| 59 | 8 | 0 | -15.963832 | 1.163562  | -1.344595 |
| 60 | 6 | 0 | 13.787933  | -2.048857 | -0.788405 |
| 61 | 8 | 0 | 14.626590  | -3.095092 | -1.012899 |
| 62 | 6 | 0 | 16.028166  | -2.864272 | -0.964186 |
| 63 | 6 | 0 | -17.169302 | 0.428475  | -1.182092 |
| 64 | 1 | 0 | 3.119803   | 4.430659  | -0.058416 |
| 65 | 1 | 0 | 0.665811   | 4.444038  | -0.038462 |
| 66 | 1 | 0 | 3.168018   | 0.139137  | 0.272688  |
| 67 | 1 | 0 | -1.929241  | 3.908982  | 0.010660  |
| 68 | 1 | 0 | -4.196281  | 2.895300  | 0.089157  |
| 69 | 1 | 0 | -2.466699  | -1.036229 | 0.386254  |
| 70 | 1 | 0 | 0.599021   | -1.276131 | 4.935053  |
| 71 | 1 | 0 | 1.053716   | -3.630153 | 4.313631  |
| 72 | 1 | 0 | 1.136581   | -4.309803 | 1.926469  |
| 73 | 1 | 0 | 0.217855   | 0.440251  | 3.174754  |
| 74 | 1 | 0 | 1.116910   | -4.498363 | -0.690320 |
| 75 | 1 | 0 | 0.993229   | -4.168956 | -3.148869 |
| 76 | 1 | 0 | 0.523801   | -1.928336 | -4.094202 |
| 77 | 1 | 0 | 0.169358   | 0.023235  | -2.593795 |
| 78 | 1 | 0 | -4.344083  | -1.614326 | 1.154890  |
| 79 | 1 | 0 | -6.687526  | -2.436647 | 1.174514  |
| 80 | 1 | 0 | -7.886085  | 1.388226  | -0.384427 |
| 81 | 1 | 0 | 7.134081   | 0.010713  | -0.324275 |
| 82 | 1 | 0 | 7.577421   | 4.192043  | 0.579403  |
| 83 | 1 | 0 | 5.100682   | 4.354778  | 0.637104  |
| 84 | 1 | 0 | -11.510889 | 1.474613  | -0.950868 |
| 85 | 1 | 0 | -13.749723 | 2.357805  | -1.573171 |
| 86 | 1 | 0 | -15.554712 | -1.329789 | -0.281323 |
| 87 | 1 | 0 | -13.331922 | -2.200452 | 0.333530  |
| 88 | 1 | 0 | 10.419292  | -1.587367 | -0.685296 |
| 89 | 1 | 0 | 12.115472  | -3.364290 | -1.067749 |
| 90 | 1 | 0 | 15.256885  | -0.486538 | -0.456063 |
| 91 | 1 | 0 | 13.570299  | 1.271773  | -0.078283 |
| 92 | 1 | 0 | 16.495352  | -3.828851 | -1.168895 |
| 93 | 1 | 0 | 16.342491  | -2.139041 | -1.725573 |
| 94 | 1 | 0 | 16.342718  | -2.510487 | 0.025943  |
| 95 | 1 | 0 | -17.966120 | 1.081267  | -1.542003 |
| 96 | 1 | 0 | -17.159884 | -0.494886 | -1.775196 |
| 97 | 1 | 0 | -17.349792 | 0.181285  | -0.128150 |

**Table S3.** B3LYP/6-31G(d) optimised geometry of compound **6a-iso**. $E_{\text{total}} = -2365.869631$  Hartree

Dipole moment (Debye): X= 0.4132 Y= 1.0338 Z= -1.3336 Tot= 1.7372

| Center Number | Atomic Number | Atomic Type | Coordinates (Angstroms) |           |           |
|---------------|---------------|-------------|-------------------------|-----------|-----------|
|               |               |             | X                       | Y         | Z         |
| 1             | 6             | 0           | 3.425874                | -0.864894 | 0.305306  |
| 2             | 6             | 0           | 2.334215                | -0.087879 | 0.745310  |
| 3             | 6             | 0           | 1.035564                | -0.512561 | 0.505474  |
| 4             | 6             | 0           | 0.797159                | -1.721497 | -0.179902 |
| 5             | 6             | 0           | 1.867050                | -2.502750 | -0.620957 |
| 6             | 6             | 0           | 3.168745                | -2.071004 | -0.375358 |
| 7             | 6             | 0           | -0.650544               | -1.914840 | -0.291991 |
| 8             | 6             | 0           | -1.296901               | -0.820525 | 0.318001  |
| 9             | 6             | 0           | -2.682357               | -0.756772 | 0.356064  |
| 10            | 6             | 0           | -3.453549               | -1.788222 | -0.218785 |
| 11            | 6             | 0           | -2.790596               | -2.873635 | -0.824107 |
| 12            | 6             | 0           | -1.399983               | -2.944603 | -0.864710 |
| 13            | 6             | 0           | -0.278938               | 0.171005  | 0.881731  |
| 14            | 6             | 0           | -0.413587               | 1.576984  | 0.225455  |
| 15            | 6             | 0           | -0.292731               | 1.621758  | -1.300834 |
| 16            | 6             | 0           | -0.424553               | 0.340001  | 2.423018  |
| 17            | 6             | 0           | -0.325164               | -0.944062 | 3.251965  |
| 18            | 6             | 0           | 4.815106                | -0.421311 | 0.554191  |
| 19            | 6             | 0           | -4.931647               | -1.732039 | -0.190215 |
| 20            | 6             | 0           | 5.836010                | -0.639574 | -0.390477 |
| 21            | 7             | 0           | 7.107282                | -0.275580 | -0.232472 |
| 22            | 6             | 0           | 7.437375                | 0.353258  | 0.907554  |
| 23            | 6             | 0           | 6.506881                | 0.640760  | 1.917347  |
| 24            | 6             | 0           | 5.190135                | 0.245237  | 1.733178  |
| 25            | 6             | 0           | -5.723370               | -2.882318 | -0.031155 |
| 26            | 6             | 0           | -7.106118               | -2.775291 | -0.015648 |
| 27            | 6             | 0           | -7.678645               | -1.502070 | -0.155540 |
| 28            | 7             | 0           | -6.948407               | -0.385811 | -0.312629 |
| 29            | 6             | 0           | -5.622789               | -0.513687 | -0.331108 |
| 30            | 6             | 0           | 8.834039                | 0.746020  | 1.082017  |
| 31            | 6             | 0           | -9.133034               | -1.361712 | -0.134592 |
| 32            | 7             | 0           | 9.366248                | 1.368105  | 2.095572  |
| 33            | 7             | 0           | 10.712883               | 1.516883  | 1.808540  |
| 34            | 6             | 0           | 10.905045               | 0.972395  | 0.636260  |
| 35            | 8             | 0           | 9.751628                | 0.462323  | 0.116029  |
| 36            | 7             | 0           | -10.021612              | -2.305771 | -0.005248 |
| 37            | 7             | 0           | -11.262440              | -1.692558 | -0.045538 |
| 38            | 6             | 0           | -11.040060              | -0.413826 | -0.197314 |
| 39            | 8             | 0           | -9.706522               | -0.132496 | -0.261179 |
| 40            | 6             | 0           | 12.140087               | 0.858936  | -0.120951 |
| 41            | 6             | 0           | -12.004213              | 0.668578  | -0.298900 |
| 42            | 6             | 0           | 12.170865               | 0.234190  | -1.381468 |
| 43            | 6             | 0           | 13.359778               | 0.134227  | -2.085550 |
| 44            | 6             | 0           | 14.547664               | 0.656224  | -1.547609 |
| 45            | 6             | 0           | 14.526615               | 1.281414  | -0.291963 |
| 46            | 6             | 0           | 13.328835               | 1.378449  | 0.410213  |
| 47            | 6             | 0           | -11.592252              | 2.005548  | -0.449992 |
| 48            | 6             | 0           | -12.529484              | 3.021444  | -0.544535 |
| 49            | 6             | 0           | -13.901750              | 2.726538  | -0.490854 |
| 50            | 6             | 0           | -14.321890              | 1.396529  | -0.340530 |
| 51            | 6             | 0           | -13.375211              | 0.380819  | -0.245947 |
| 52            | 8             | 0           | 15.658365               | 0.505868  | -2.317912 |
| 53            | 8             | 0           | -14.737910              | 3.794272  | -0.593050 |
| 54            | 6             | 0           | -16.139465              | 3.565313  | -0.544833 |
| 55            | 6             | 0           | 16.894811               | 1.009885  | -1.831847 |
| 56            | 1             | 0           | 2.519508                | 0.858012  | 1.248418  |
| 57            | 1             | 0           | 1.696880                | -3.441606 | -1.141464 |
| 58            | 1             | 0           | 4.002464                | -2.691443 | -0.690530 |
| 59            | 1             | 0           | -3.181965               | 0.071334  | 0.852206  |
| 60            | 1             | 0           | -3.376583               | -3.658713 | -1.293514 |
| 61            | 1             | 0           | -0.913600               | -3.789728 | -1.344846 |
| 62            | 1             | 0           | -1.382993               | 1.996051  | 0.527468  |
| 63            | 1             | 0           | 0.349426                | 2.230056  | 0.670373  |

|    |   |   |            |           |           |
|----|---|---|------------|-----------|-----------|
| 64 | 1 | 0 | -0.404078  | 2.651241  | -1.658915 |
| 65 | 1 | 0 | 0.682393   | 1.254919  | -1.637696 |
| 66 | 1 | 0 | -1.065855  | 1.014947  | -1.783717 |
| 67 | 1 | 0 | 0.343566   | 1.050881  | 2.756847  |
| 68 | 1 | 0 | -1.390253  | 0.825835  | 2.618069  |
| 69 | 1 | 0 | -0.442383  | -0.717200 | 4.317472  |
| 70 | 1 | 0 | -1.105058  | -1.661217 | 2.975561  |
| 71 | 1 | 0 | 0.644974   | -1.434509 | 3.119408  |
| 72 | 1 | 0 | 5.599563   | -1.119976 | -1.338140 |
| 73 | 1 | 0 | 6.831135   | 1.149131  | 2.818758  |
| 74 | 1 | 0 | 4.454999   | 0.429167  | 2.511440  |
| 75 | 1 | 0 | -5.252935  | -3.852113 | 0.103173  |
| 76 | 1 | 0 | -7.745907  | -3.641511 | 0.112453  |
| 77 | 1 | 0 | -5.064433  | 0.407215  | -0.489416 |
| 78 | 1 | 0 | 11.256773  | -0.171357 | -1.802762 |
| 79 | 1 | 0 | 13.398668  | -0.345013 | -3.058413 |
| 80 | 1 | 0 | 15.430492  | 1.691560  | 0.142940  |
| 81 | 1 | 0 | 13.305077  | 1.860196  | 1.382319  |
| 82 | 1 | 0 | -10.533627 | 2.240173  | -0.492557 |
| 83 | 1 | 0 | -12.226523 | 4.056948  | -0.661154 |
| 84 | 1 | 0 | -15.375098 | 1.145187  | -0.296731 |
| 85 | 1 | 0 | -13.692738 | -0.650342 | -0.129853 |
| 86 | 1 | 0 | -16.604731 | 4.547418  | -0.643316 |
| 87 | 1 | 0 | -16.470239 | 2.921907  | -1.370202 |
| 88 | 1 | 0 | -16.440371 | 3.114504  | 0.409528  |
| 89 | 1 | 0 | 17.633018  | 0.779217  | -2.601631 |
| 90 | 1 | 0 | 16.854668  | 2.096234  | -1.680752 |
| 91 | 1 | 0 | 17.185471  | 0.523354  | -0.891976 |

**Table S4.** B3LYP/6-31G(d) optimised geometry of compound **7a-iso**.

E(RB+HF-LYP) = -2669.5231617 Hartree

Dipole moment (Debye): X= 0.4313 Y= 0.8057 Z= -1.5820 Tot= 1.8270

| Center<br>Number | Atomic<br>Number | Atomic<br>Type | Coordinates (Angstroms) |           |           |
|------------------|------------------|----------------|-------------------------|-----------|-----------|
|                  |                  |                | X                       | Y         | Z         |
| 1                | 6                | 0              | -3.373431               | -2.179870 | -0.026913 |
| 2                | 6                | 0              | -2.711019               | -3.367683 | -0.396103 |
| 3                | 6                | 0              | -1.320680               | -3.448648 | -0.422252 |
| 4                | 6                | 0              | -0.568631               | -2.324109 | -0.074570 |
| 5                | 6                | 0              | -1.219207               | -1.131737 | 0.296963  |
| 6                | 6                | 0              | -2.602896               | -1.053562 | 0.323519  |
| 7                | 6                | 0              | 0.879704                | -2.108640 | -0.009505 |
| 8                | 6                | 0              | 1.953458                | -2.959290 | -0.281591 |
| 9                | 6                | 0              | 3.252936                | -2.479489 | -0.132734 |
| 10               | 6                | 0              | 3.505914                | -1.157063 | 0.283797  |
| 11               | 6                | 0              | 2.413494                | -0.309609 | 0.554345  |
| 12               | 6                | 0              | 1.120120                | -0.785472 | 0.408499  |
| 13               | 6                | 0              | -0.457032               | 0.554063  | 4.459769  |
| 14               | 6                | 0              | -0.658101               | 1.938600  | 4.431075  |
| 15               | 6                | 0              | -0.705056               | 2.626347  | 3.216451  |
| 16               | 6                | 0              | -0.547828               | 1.909056  | 2.028679  |
| 17               | 6                | 0              | -0.345550               | 0.516194  | 2.061695  |
| 18               | 6                | 0              | -0.299107               | -0.166818 | 3.270961  |
| 19               | 6                | 0              | -0.550829               | 2.351278  | 0.627079  |
| 20               | 6                | 0              | -0.714402               | 3.619698  | 0.066452  |
| 21               | 6                | 0              | -0.674593               | 3.753267  | -1.323122 |
| 22               | 6                | 0              | -0.474112               | 2.636309  | -2.141816 |
| 23               | 6                | 0              | -0.309733               | 1.364375  | -1.582442 |
| 24               | 6                | 0              | -0.349297               | 1.229936  | -0.199957 |
| 25               | 6                | 0              | -0.199006               | -0.042089 | 0.641787  |
| 26               | 6                | 0              | -4.851639               | -2.116480 | -0.011872 |
| 27               | 6                | 0              | 4.893297                | -0.666839 | 0.439404  |
| 28               | 6                | 0              | 5.260437                | 0.226591  | 1.460206  |
| 29               | 6                | 0              | 6.575165                | 0.656252  | 1.564219  |
| 30               | 6                | 0              | 7.510483                | 0.173850  | 0.636417  |
| 31               | 7                | 0              | 7.187645                | -0.674721 | -0.353331 |

|    |   |   |            |           |           |
|----|---|---|------------|-----------|-----------|
| 32 | 6 | 0 | 5.918200   | -1.068938 | -0.437659 |
| 33 | 6 | 0 | -5.538626  | -0.952640 | -0.406122 |
| 34 | 7 | 0 | -6.863914  | -0.820737 | -0.415861 |
| 35 | 6 | 0 | -7.597158  | -1.876617 | -0.026855 |
| 36 | 6 | 0 | -7.028595  | -3.093702 | 0.377575  |
| 37 | 6 | 0 | -5.645960  | -3.205669 | 0.384697  |
| 38 | 6 | 0 | 8.904596   | 0.601416  | 0.732804  |
| 39 | 7 | 0 | 9.430111   | 1.410161  | 1.608739  |
| 40 | 7 | 0 | 10.775962  | 1.511746  | 1.299352  |
| 41 | 6 | 0 | 10.974773  | 0.754541  | 0.253090  |
| 42 | 8 | 0 | 9.826492   | 0.144886  | -0.160429 |
| 43 | 6 | 0 | -9.050973  | -1.728214 | -0.033791 |
| 44 | 7 | 0 | -9.944019  | -2.612669 | 0.309305  |
| 45 | 7 | 0 | -11.181810 | -2.016275 | 0.135758  |
| 46 | 6 | 0 | -10.952940 | -0.806613 | -0.302400 |
| 47 | 8 | 0 | -9.618408  | -0.556015 | -0.433323 |
| 48 | 6 | 0 | 12.212693  | 0.512084  | -0.468307 |
| 49 | 6 | 0 | -11.910757 | 0.231446  | -0.644027 |
| 50 | 6 | 0 | 12.254214  | -0.336800 | -1.589746 |
| 51 | 6 | 0 | 13.446150  | -0.551527 | -2.262543 |
| 52 | 6 | 0 | 14.626248  | 0.076435  | -1.831323 |
| 53 | 6 | 0 | 14.594656  | 0.923926  | -0.713874 |
| 54 | 6 | 0 | 13.394013  | 1.135444  | -0.042670 |
| 55 | 6 | 0 | -11.490867 | 1.489643  | -1.113840 |
| 56 | 6 | 0 | -12.421640 | 2.464118  | -1.435287 |
| 57 | 6 | 0 | -14.223188 | 0.954671  | -0.826671 |
| 58 | 6 | 0 | -13.282926 | -0.020011 | -0.505782 |
| 59 | 8 | 0 | 15.740554  | -0.200325 | -2.560337 |
| 60 | 6 | 0 | -13.795123 | 2.205794  | -1.294974 |
| 61 | 8 | 0 | -14.624096 | 3.228009  | -1.638065 |
| 62 | 6 | 0 | -16.026701 | 3.032912  | -1.521920 |
| 63 | 6 | 0 | 16.968520  | 0.403962  | -2.178447 |
| 64 | 1 | 0 | -3.298103  | -4.231612 | -0.694235 |
| 65 | 1 | 0 | -0.835736  | -4.374764 | -0.719486 |
| 66 | 1 | 0 | -3.092513  | -0.136465 | 0.638289  |
| 67 | 1 | 0 | 1.786533   | -3.986237 | -0.595729 |
| 68 | 1 | 0 | 4.089285   | -3.148025 | -0.314314 |
| 69 | 1 | 0 | 2.586345   | 0.720969  | 0.851579  |
| 70 | 1 | 0 | -0.423823  | 0.033609  | 5.412988  |
| 71 | 1 | 0 | -0.779499  | 2.484071  | 5.363036  |
| 72 | 1 | 0 | -0.862104  | 3.701778  | 3.200363  |
| 73 | 1 | 0 | -0.143690  | -1.242254 | 3.295708  |
| 74 | 1 | 0 | -0.870719  | 4.490931  | 0.697308  |
| 75 | 1 | 0 | -0.800665  | 4.734395  | -1.772908 |
| 76 | 1 | 0 | -0.445632  | 2.756973  | -3.221247 |
| 77 | 1 | 0 | -0.154252  | 0.498463  | -2.220629 |
| 78 | 1 | 0 | 4.521076   | 0.562311  | 2.181647  |
| 79 | 1 | 0 | 6.894193   | 1.338479  | 2.344504  |
| 80 | 1 | 0 | 5.687022   | -1.733527 | -1.268083 |
| 81 | 1 | 0 | -4.977543  | -0.086928 | -0.753039 |
| 82 | 1 | 0 | -7.670728  | -3.911760 | 0.685080  |
| 83 | 1 | 0 | -5.178249  | -4.127166 | 0.719479  |
| 84 | 1 | 0 | 11.346117  | -0.824851 | -1.928504 |
| 85 | 1 | 0 | 13.493234  | -1.203107 | -3.129083 |
| 86 | 1 | 0 | 15.492455  | 1.418879  | -0.362576 |
| 87 | 1 | 0 | 13.361802  | 1.789858  | 0.822381  |
| 88 | 1 | 0 | -10.431282 | 1.695940  | -1.224646 |
| 89 | 1 | 0 | -12.112638 | 3.438654  | -1.799241 |
| 90 | 1 | 0 | -15.277495 | 0.732790  | -0.710099 |
| 91 | 1 | 0 | -13.606584 | -0.990308 | -0.143288 |
| 92 | 1 | 0 | -16.484828 | 3.968167  | -1.847778 |
| 93 | 1 | 0 | -16.373503 | 2.214662  | -2.165968 |
| 94 | 1 | 0 | -16.319701 | 2.827119  | -0.484399 |
| 95 | 1 | 0 | 17.710922  | 0.046398  | -2.893796 |
| 96 | 1 | 0 | 16.911176  | 1.498789  | -2.230647 |
| 97 | 1 | 0 | 17.266166  | 0.104318  | -1.165380 |

---
